**Bucking, C. and Wood, C. M. (2005).** Renal regulation of plasma glucose in the freshwater rainbow trout. *J. Exp. Biol.* **208**, 2731-2739.

In the online version of this paper, the regression equations reported in the captions of Figs 3 and 4 (p. 2736) are incorrect. The correct captions, together with the original figures, are shown below.

The print version of the article is unaffected by this error.

The authors apologise to readers for any inconvenience this may have caused.

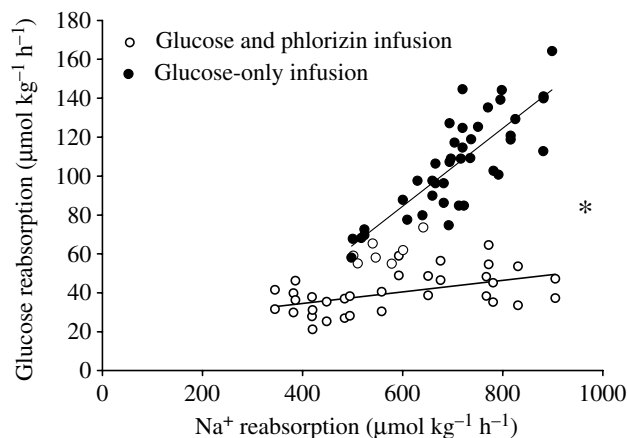

Fig. 3. Glucose reabsorption ( $\mu\text{mol kg}^{-1} \text{h}^{-1}$ ) vs  $\text{Na}^+$  reabsorption ( $\mu\text{mol kg}^{-1} \text{h}^{-1}$ ) in fish infused with glucose-only or phlorizin and glucose together. \* indicates significantly different ( $P < 0.05$ ) regression line slopes. Points are values for individual fish at different times, not mean values. Regression equations: for glucose only group,  $y = 0.200x - 35.471$  ( $r^2 = 0.8489$ ) and for glucose + phlorizin treated group,  $y = 0.031x + 58.047$  ( $r^2 = 0.018$ ).

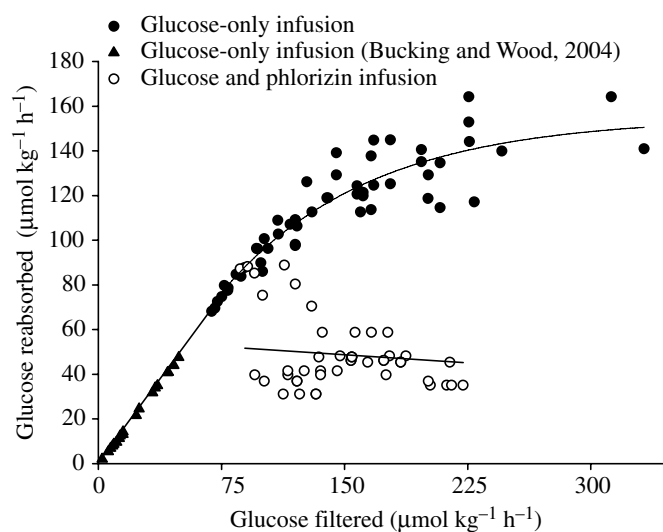

Fig. 4. Glucose filtration ( $\mu\text{mol kg}^{-1} \text{h}^{-1}$ ) vs glucose reabsorption ( $\mu\text{mol kg}^{-1} \text{h}^{-1}$ ) in fish infused with glucose-only or phlorizin and glucose together. Points are values for individual fish at different times, not mean values. See text for details. Regression equations: for glucose only group,  $y = 162.01 - [171 / (1 + 0.00004x)^{227.7}]$  ( $r^2 = 0.9657$ ) and for glucose + phlorizin treated group,  $y = 0.29x + 22.586$  ( $r^2 = 0.2584$ ).
